# Supplementary material for: Tetramine-Based Hyperbranched Polyimide Membranes with Rigid Crosslinker for Improved Gas Permeability and Stability
Source: MDPI journal article supplement (doi:10.3390/polym15143017), 2023-07-12
Supplement: s1 [file s1]

*Supporting Information*

# **Tetramine-based Hyperbranched Polyimide Membranes with Rigid Crosslinker for Improved Gas Permeability and Stability**

**Xiangyun Liu <sup>1,2</sup>, Honglei Ling <sup>2,\*</sup>, Jiangzhou Luo <sup>2</sup>, Xueping Zong <sup>2</sup> and Song Xue <sup>2,\*</sup>**

<sup>1</sup> School of Materials Science and Engineering, Tianjin University of Technology, Tianjin 300384, China

<sup>2</sup> Tianjin Key Laboratory of Organic Solar Cells and Photochemical Conversion, School of Chemistry and Chemical Engineering, Tianjin University of Technology, Tianjin 300384, China

\* Correspondence: linghl@email.tjut.edu.cn (H.L.); xuesong@ustc.edu.cn (S.X.)

**Table S1.** Gel content of 6FDA-DAM/TPDA membranes in different solvents.

| Sample             | Gel content (%) |       |       |
|--------------------|-----------------|-------|-------|
|                    | THF             | DCM   | DMF   |
| 6FDA-DAM/TPDA(1:1) | 99.92           | 99.89 | 99.90 |
| 6FDA-DAM/TPDA(2:1) | 99.97           | 99.96 | 99.93 |
| 6FDA-DAM/TPDA(5:1) | 99.98           | 99.96 | 99.93 |

Note: The acronyms for THF, DCM and DMF represent tetrahydrofuran, dichloromethane, and N,N-dimethylformamide, respectively.

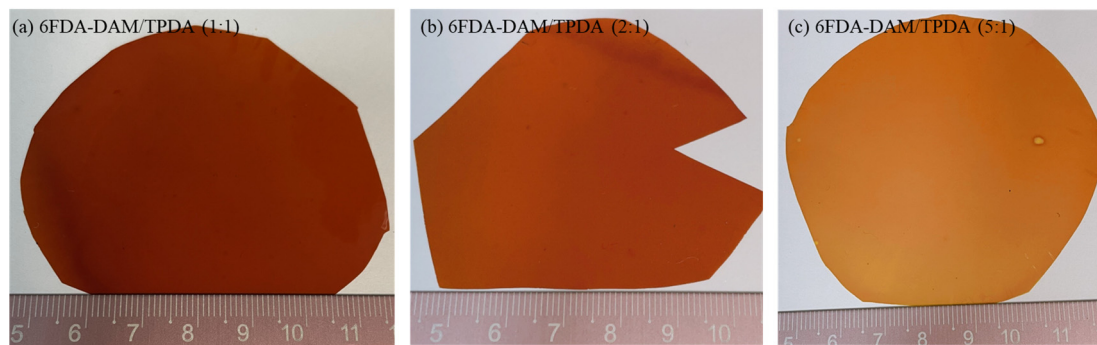

**Figure S1.** Physical appearances of 6FDA-DAM/TPDA membranes with varied DAM contents.

**Table S2.** Gas permeabilities and selectivities of the 6FDA-DAM/TPDA(5:1) membrane after aging for different days.

| Time (days) | P (Barrer)     |                |                 | Ideal selectivity ( $\alpha$ ) |                                 |
|-------------|----------------|----------------|-----------------|--------------------------------|---------------------------------|
|             | N <sub>2</sub> | O <sub>2</sub> | CO <sub>2</sub> | O <sub>2</sub> /N <sub>2</sub> | CO <sub>2</sub> /N <sub>2</sub> |
| 0           | 9.75           | 40.78          | 190.2           | 4.18                           | 19.51                           |
| 50          | 8.76           | 36.7           | 172.3           | 4.19                           | 19.67                           |
| 80          | 7.46           | 31.63          | 147.8           | 4.24                           | 19.82                           |
| 120         | 7.33           | 31.22          | 142.2           | 4.26                           | 19.71                           |
| 360         | 6.43           | 29.77          | 131.2           | 4.63                           | 20.41                           |

**Table S3.** Pressure-dependent gas permeabilities and selectivities for the 6FDA-DAM/TPDA(5:1) membrane.

| Pressure (MPa) | P (Barrer)     |                |                 | Ideal selectivity ( $\alpha$ ) |                                 |
|----------------|----------------|----------------|-----------------|--------------------------------|---------------------------------|
|                | N <sub>2</sub> | O <sub>2</sub> | CO <sub>2</sub> | O <sub>2</sub> /N <sub>2</sub> | CO <sub>2</sub> /N <sub>2</sub> |
| 0.2            | 9.75           | 40.78          | 190.2           | 4.18                           | 19.51                           |
| 0.4            | 10.48          | 38.15          | 174.3           | 3.64                           | 16.63                           |
| 0.6            | 10.12          | 34.35          | 163.8           | 3.39                           | 16.19                           |
| 0.8            | 9.63           | 33.68          | 161.2           | 3.49                           | 16.74                           |
| 1.0            | 9.11           | 33.66          | 162.7           | 3.69                           | 17.86                           |
| 1.2            | 9.01           | 33.19          | 161.9           | 3.68                           | 17.97                           |

**The gas diffusion and solubility coefficients calculation:**

The pure gas diffusion coefficient ( $10^{-8}\text{cm}^2/\text{s}$ ) was calculated by the equation of  $D = l^2/6\theta$ , where  $\theta$  is the time-lag of the permeability measurement. Ideal diffusion selectivity( $\alpha$ ) for a gas pair (A/B) is calculated as the ratio of their pure-gas diffusion coefficients:

$$\alpha_{A/B} = \frac{D_A}{D_B}$$

The solubility coefficient S ( $10^{-2}\text{cm}^3/(\text{cm}^3\text{cmHg})$ ) was obtained via the diffusion-solution model using the formula of  $S = P/D$ . Ideal solubility selectivity( $\alpha$ ) for a gas pair (A/B) is calculated as the ratio of their pure-gas solubility coefficients:

$$\alpha_{A/B} = \frac{S_A}{S_B}$$
